# Supplementary material
Source: PubMed Central journal article supplement (PMC6923606)

**A.**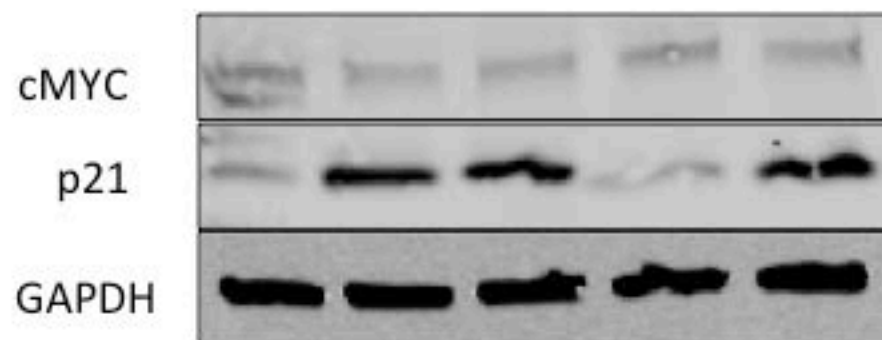

|                   |   |   |   |   |   |
|-------------------|---|---|---|---|---|
| XMD8-92 3 $\mu$ M | - | + | - | - | - |
| CPI-203 1 $\mu$ M | - | - | + | - | + |
| AX15836 1 $\mu$ M | - | - | - | + | + |

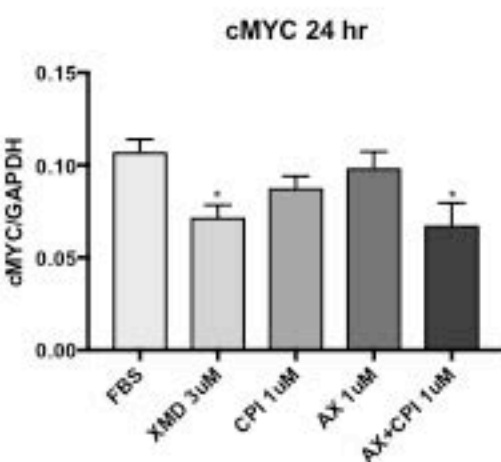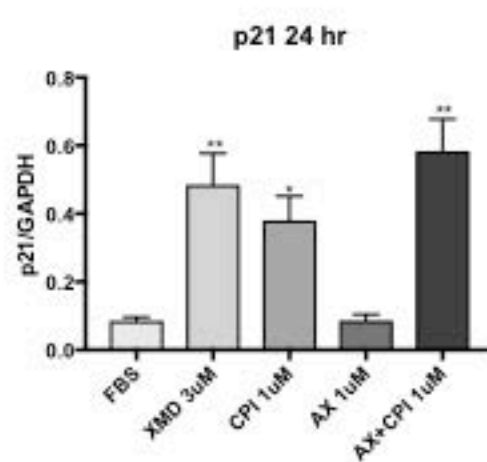**B.**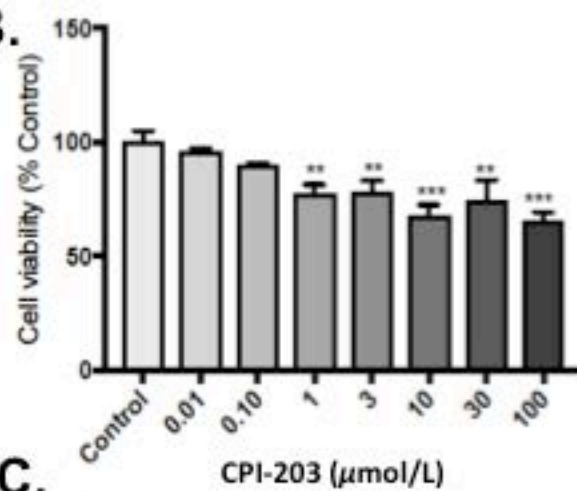**C.**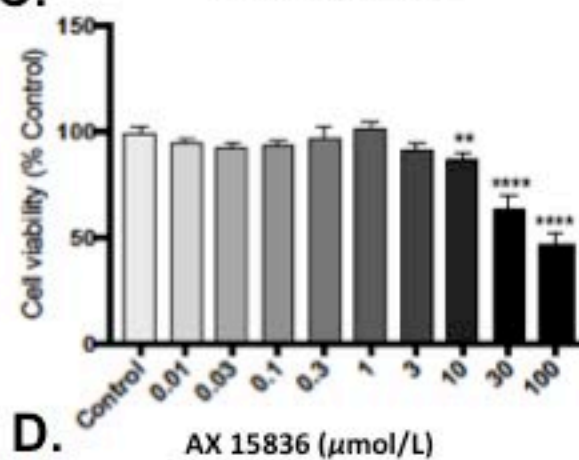**D.**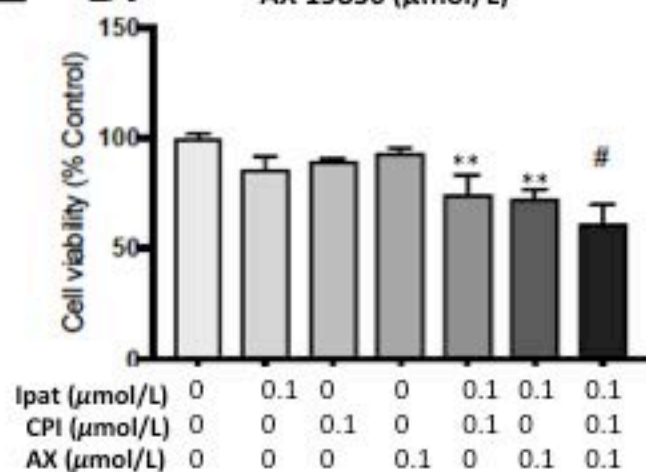

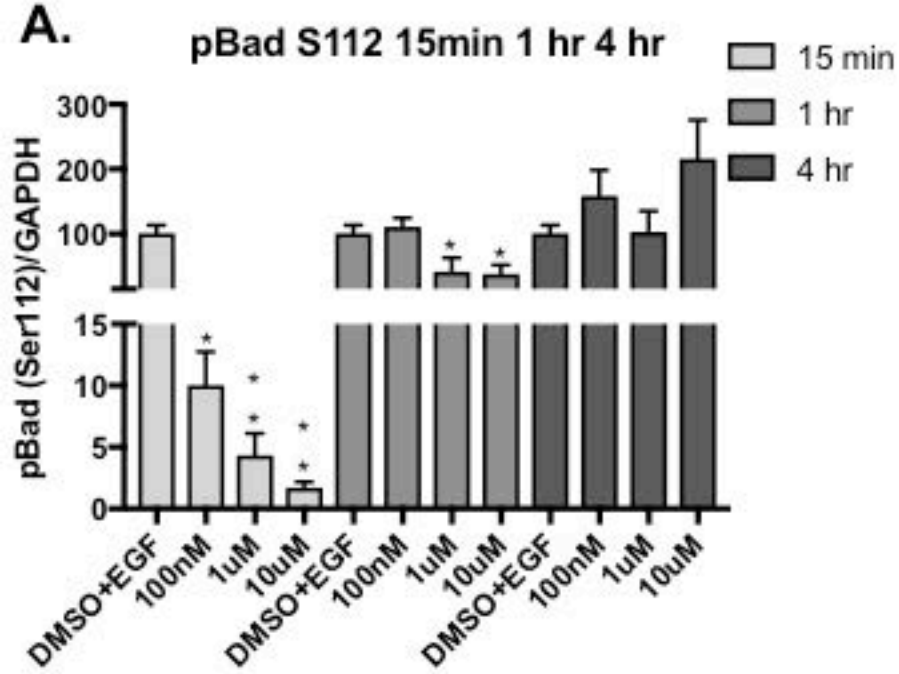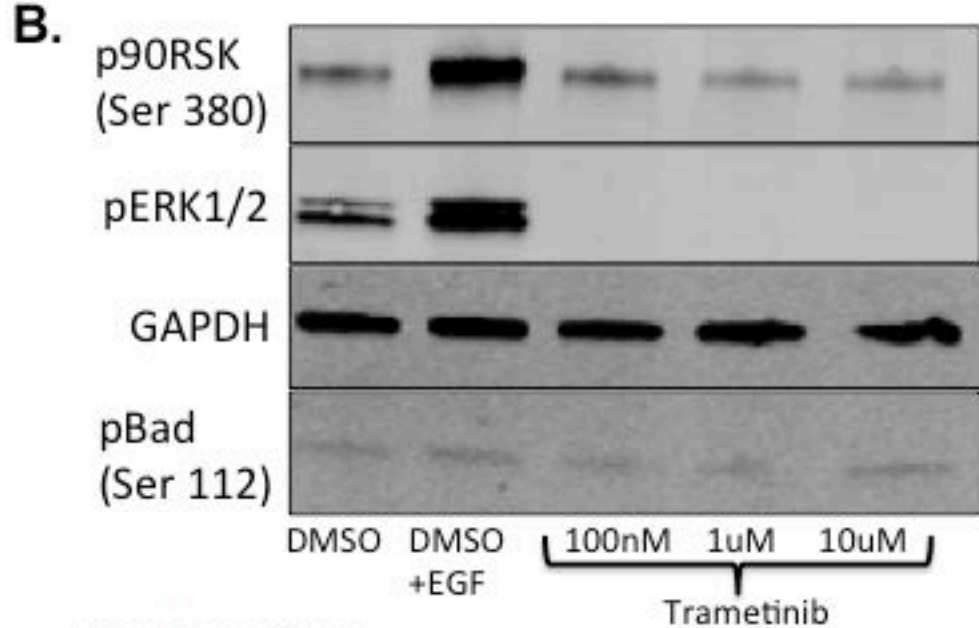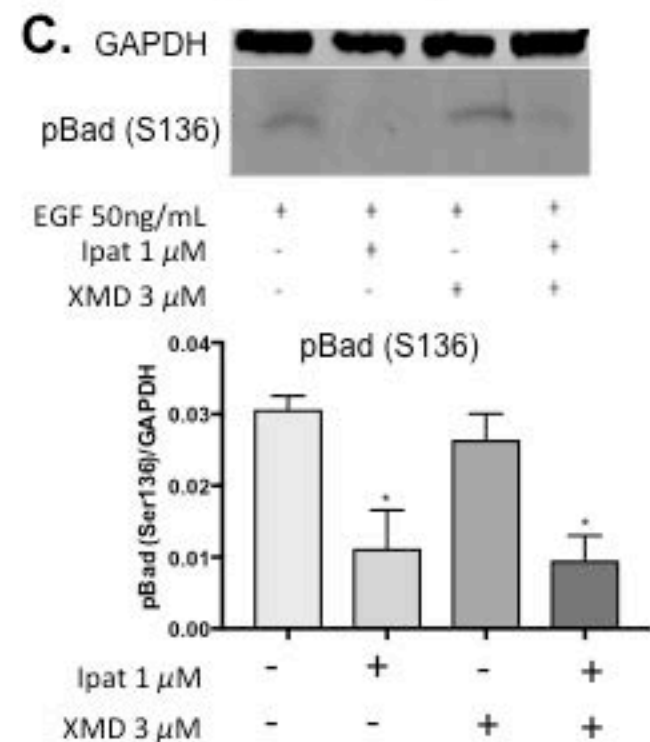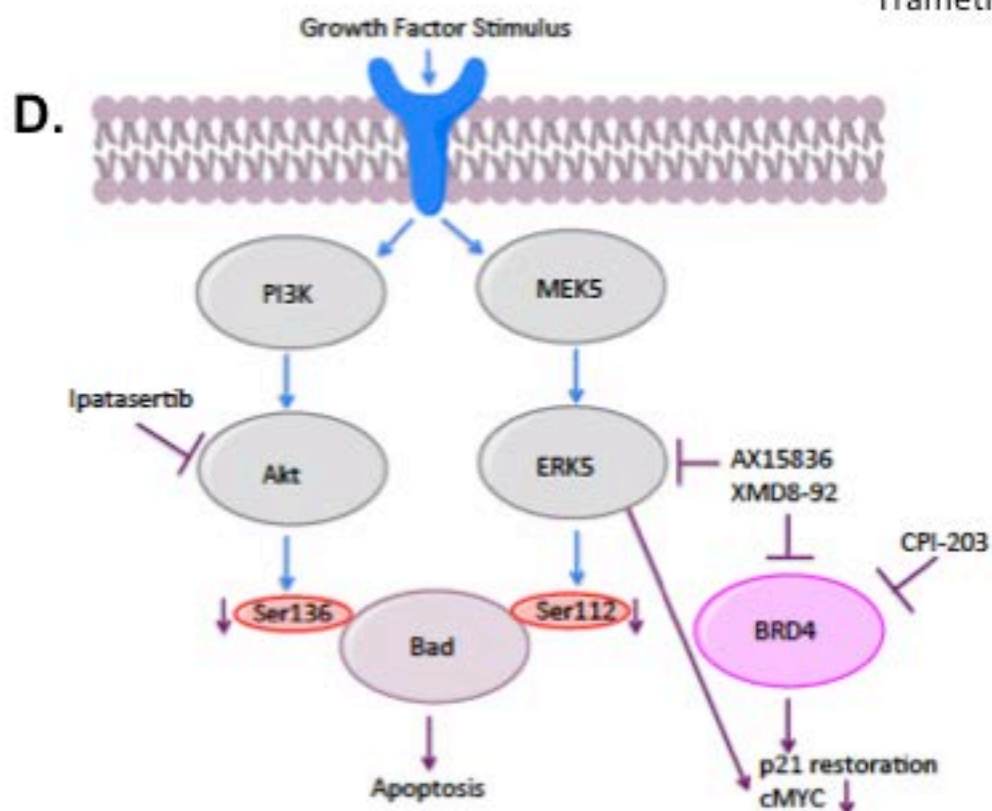

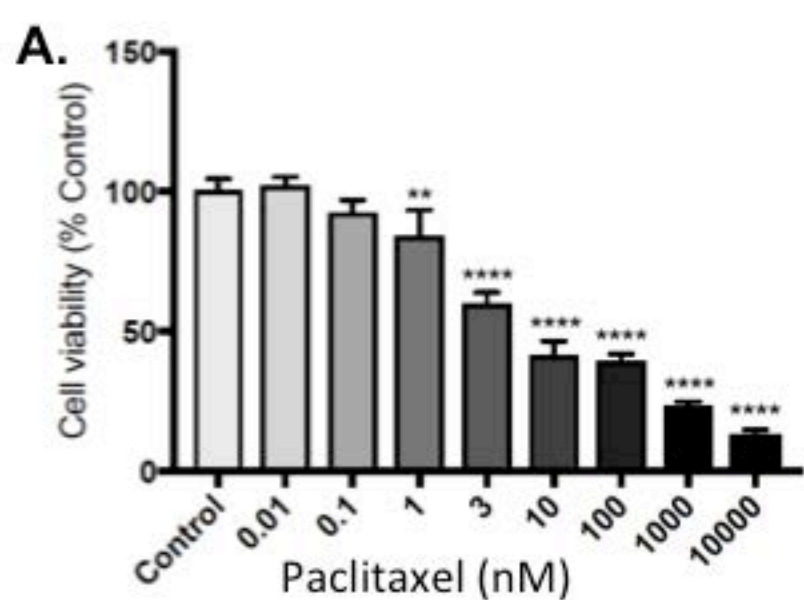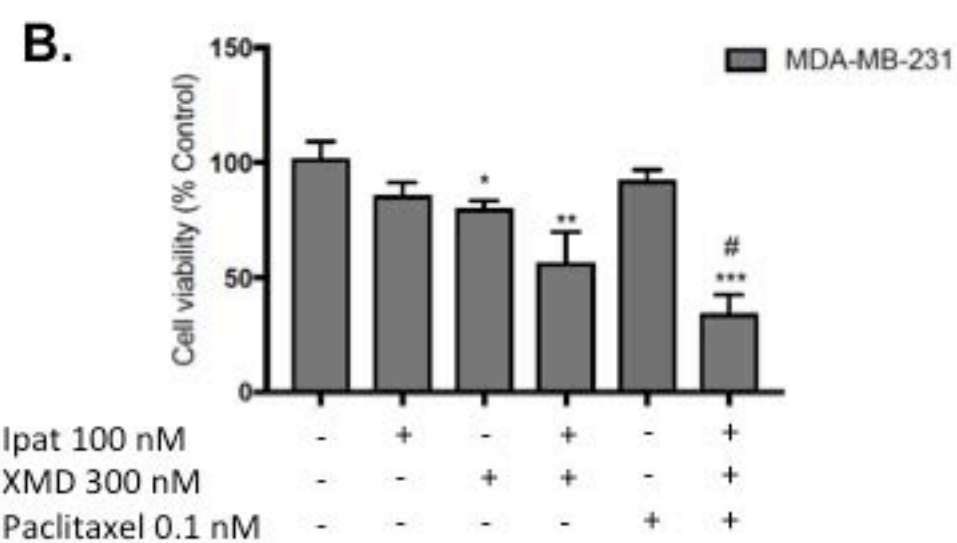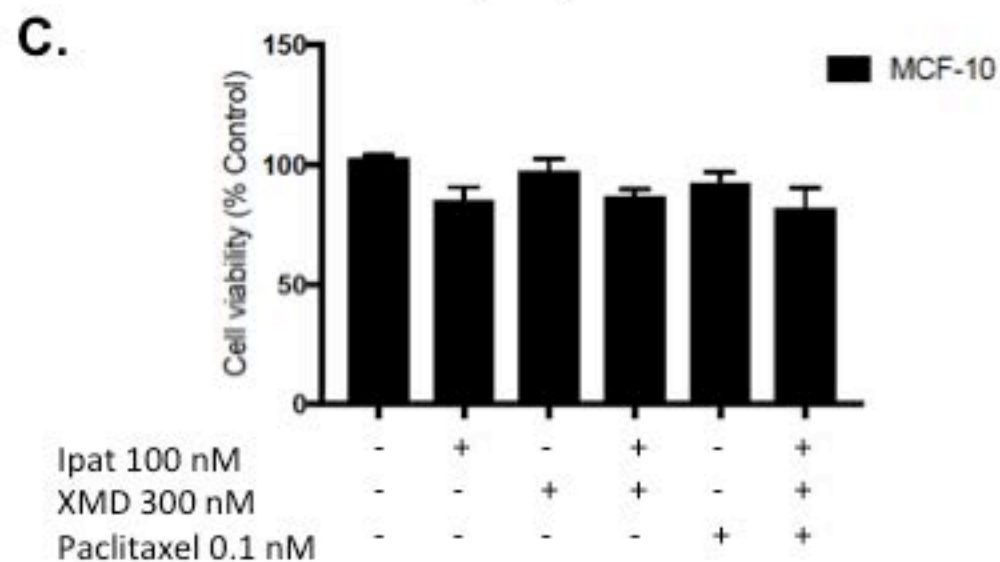

Supplement: NIHMS1047081-supplement-Supp_FigS1-3.pdf [file NIHMS1047081-supplement-Supp_FigS1-3.pdf]
